# Supplementary material
Source: PubMed Central journal article supplement (PMC7616780)
Supplement: EMS199743-supplement-Supplementary_Figure.pdf [file EMS199743-supplement-Supplementary_Figure.pdf]

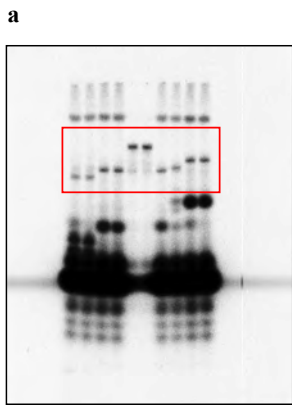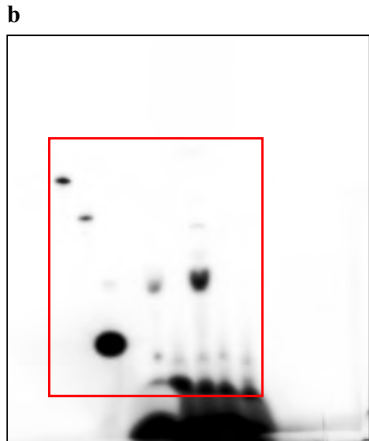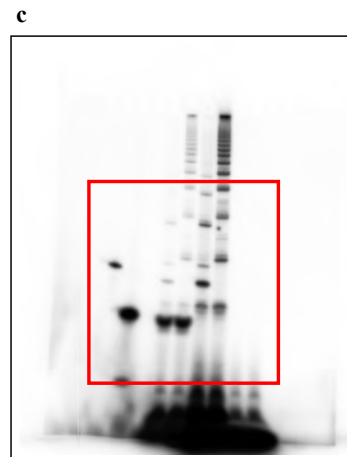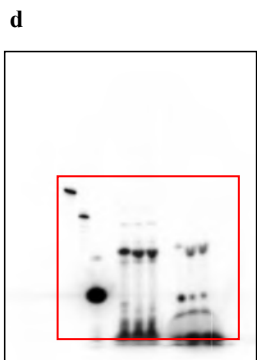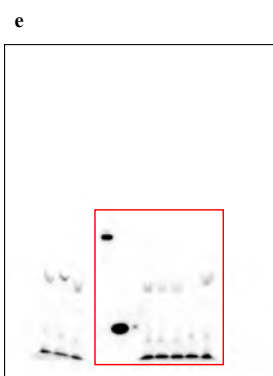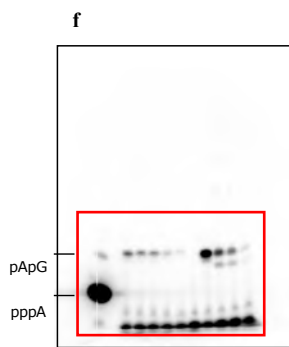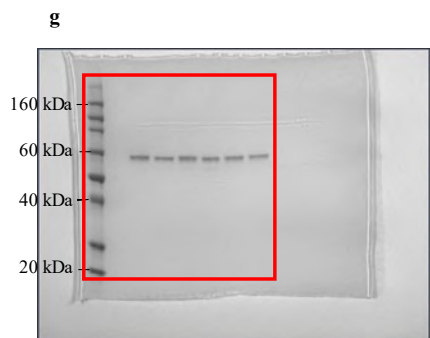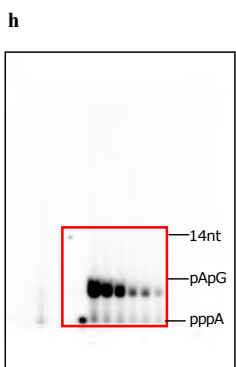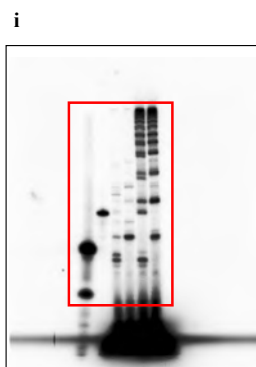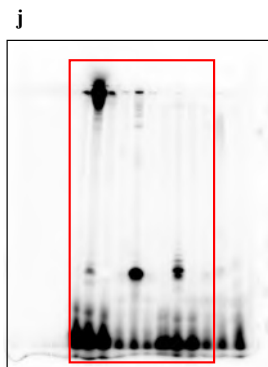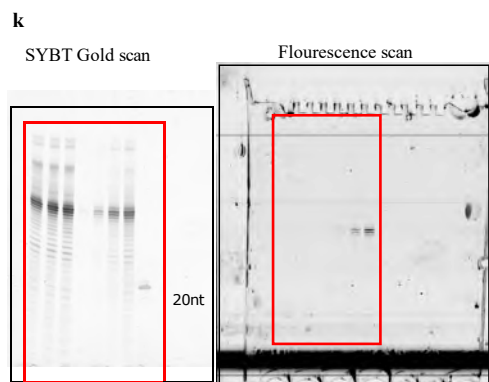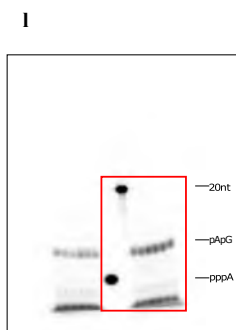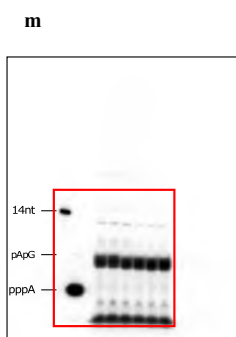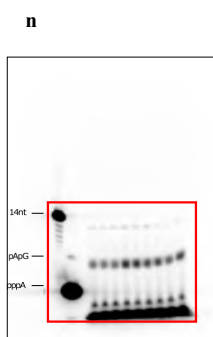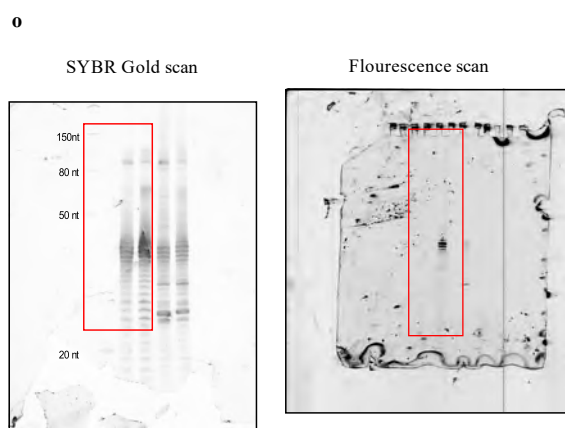

p

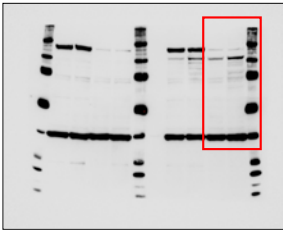

q

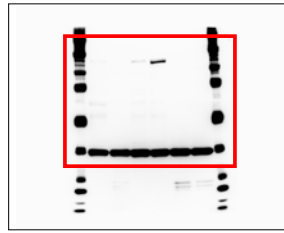

r

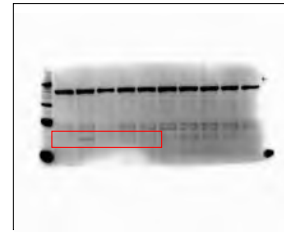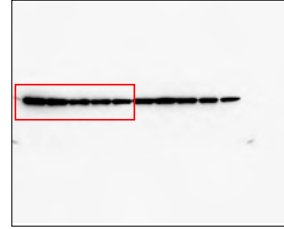

s

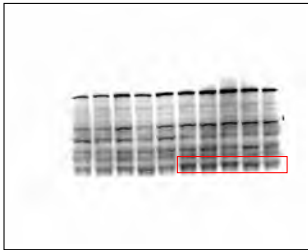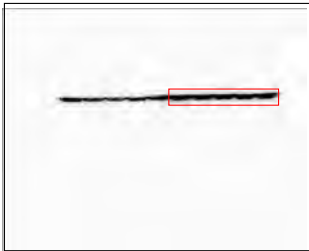

t

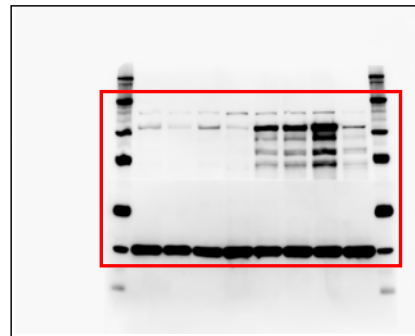

**Supplementary Fig.1 | Raw data, uncropped gels**

Uncropped RNA gels from (a) Fig. 1a, (b) Fig. 3b, (c) Fig. 3c (d) Fig. 3d, (e) Fig. 3e, (f) Fig. 3f. Uncropped protein gel from (g) Extended Fig. 7a. Uncropped RNA gels from (h) Extended Fig. 7c, (i) Extended Fig. 7d, (j) Extended Fig. 7e, (k) Extended Fig. 7f, (l) Extended Fig. 8f, (m) Extended Fig. 8g, (n) Extended Fig. 8h, (o) Extended Fig. 9a. Uncropped Western blots from (p) Extended Fig. 9c, (q) Extended Fig. 9d, (r) Extended Fig. 10a, (s) Extended Fig. 10b, (t) Extended Fig. 10d.
